# Supplementary material for: Hybrid MXene coatings: unlocking synergistic lubrication properties of Ti3C2Tx and Nb₂CTx MXenes for improved tribological performance
Source: Sci Rep. 2025 Dec 22;15:45111. doi: 10.1038/s41598-025-32533-6 (PMC12749883; doi:10.1038/s41598-025-32533-6)
Supplement: Supplementary file 1 — Supplementary Material 1 [file 41598_2025_32533_MOESM1_ESM.docx]

**Supporting Information**

**Hybrid MXene Coatings: Unlocking Synergistic Lubrication Properties of Ti₃C₂Tₓ and Nb2CTx MXenesfor Improved Tribological Performance**

Christina Danecker1, Sabine Schwarz2, Marko Piljevic3, Jakob Rath4, Martin Nastran1, 5 Bernhard Bayer-Skoff5, Michael Naguib6, Ahmad Majed6, Karamullah Eisawi6, Pierluigi Bilotto1* and Carsten Gachot1*

1 Institute of Engineering Design and Product Development, Research Unit Tribology, TU Wien, Lehargasse 6, Building BA, 9th floor 1060, Austria

2 University Service Center for TEM, TU Wien, Stadionallee 2, 1020, Vienna, Austria

3 AC2T research GmbH, Viktor-Kaplan-Straße 2/C, Wiener Neustadt, 2700, Austria

4 Analytical Instrumentation Center, TU Wien, Lehargasse 6, 1060, Vienna, Austria

5 Tulane University, School of Science and Engineering, 208 Stanley Thomas Hall (US)

6 Institute of Materials Chemistry, TU Wien, Getreidemarkt 9, 1060 Vienna, Austria

***Corresponding Author**

E-Mail: [carsten.gachot@tuwien.ac.at](mailto:carsten.gachot@tuwien.ac.at), [pierluigi.bilotto@tuwien.ac.at](mailto:pierluigi.bilotto@tuwien.ac.at)


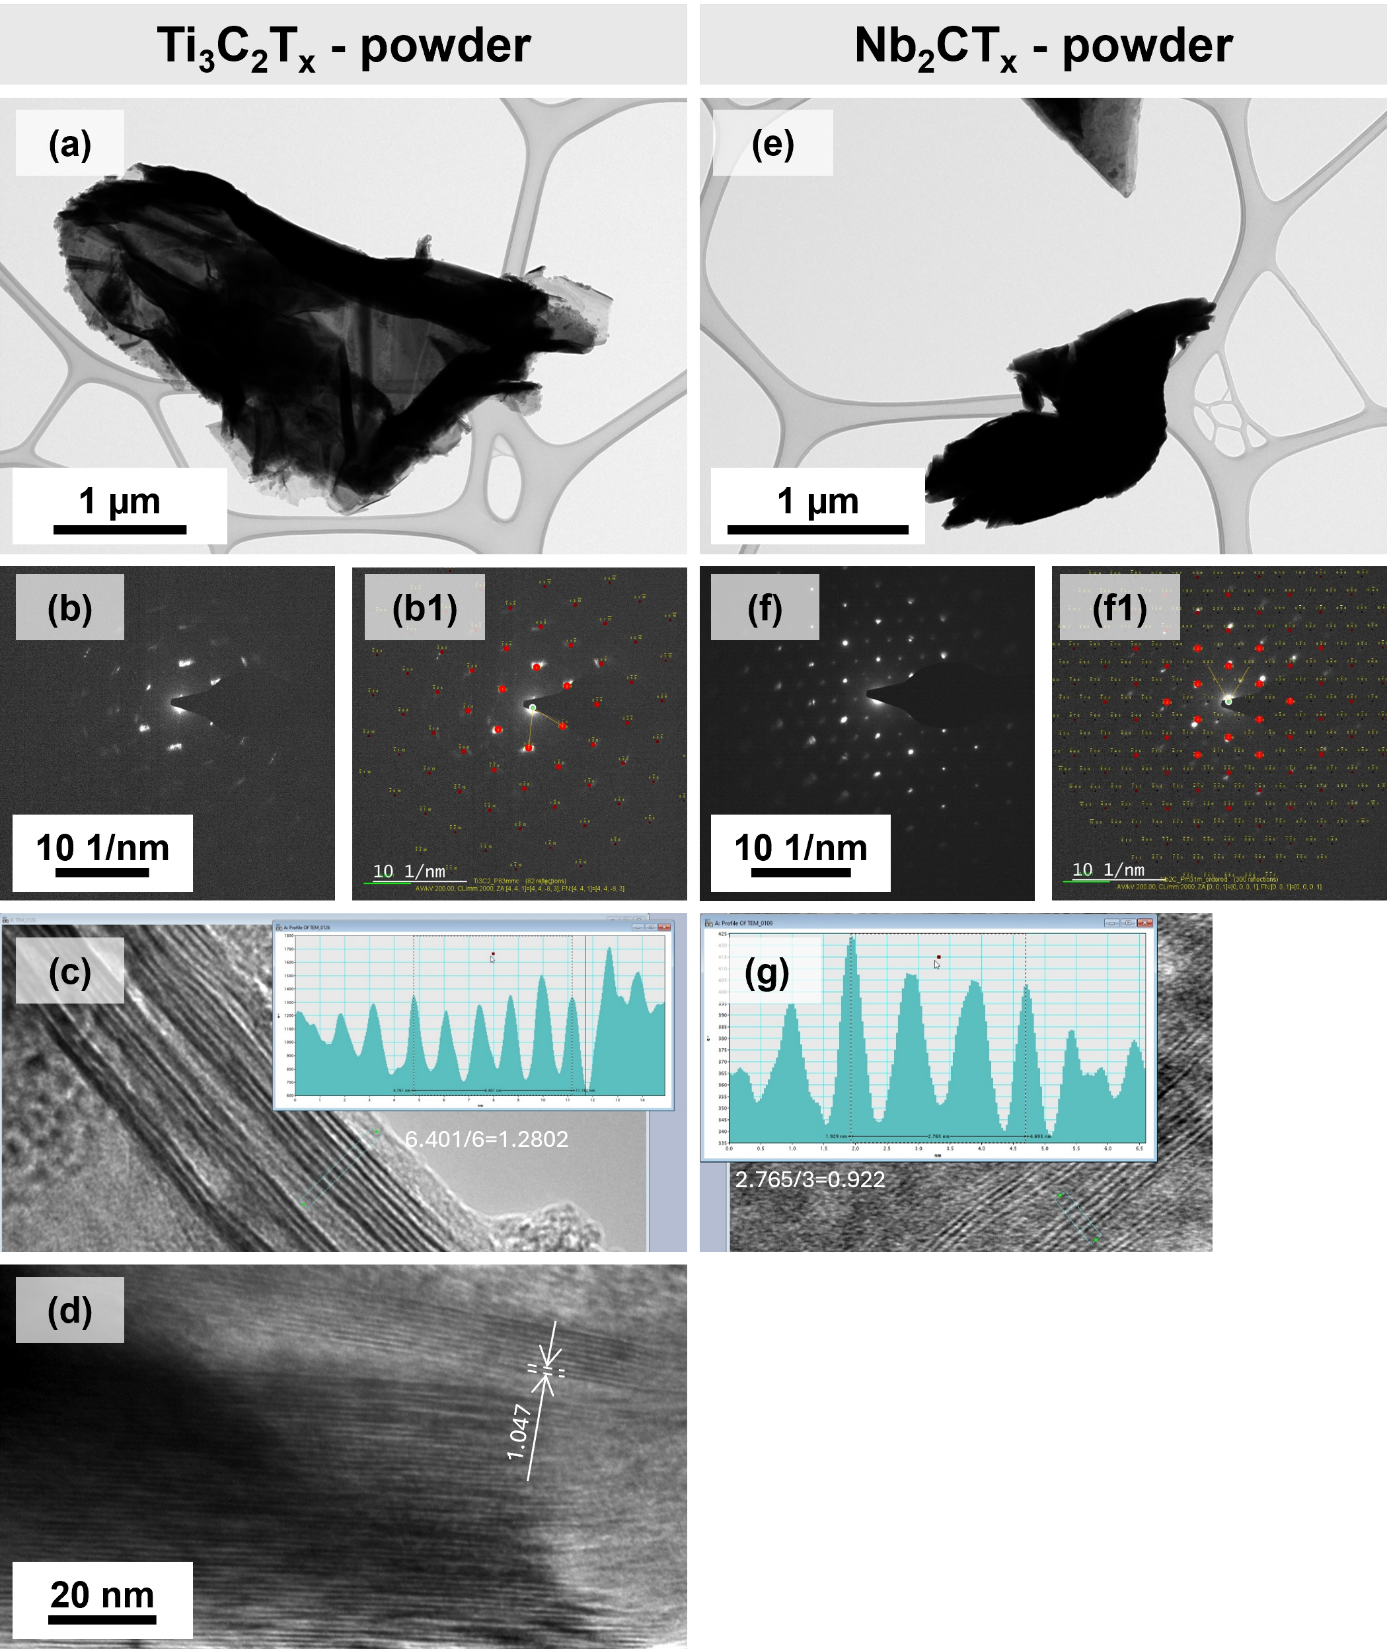


Figure S1: TEM images of the synthesized MXene powders (a) low-resolution TEM image of the as-synthesized few-layer Ti₃C₂Tₓ nanosheet. (b) SAED pattern; (b1) confirms its crystalline structure and the Ti₃C₂ phase along the [441] zone axis. (c) Measured layer thickness of Ti₃C₂Tₓ is 1.28 nm; an additional measurement from a HRTEM image yields a thickness of 1.04 nm. (e) Corresponding TEM image of a few-layer Nb₂CTₓ nanosheet. (f) and (f1) verify the crystalline structure and confirm the Nb₂C phase along the [001] zone axis. The corresponding HRTEM image (g) shows a measured layer thickness of 0.92 nm for Nb2CTx.


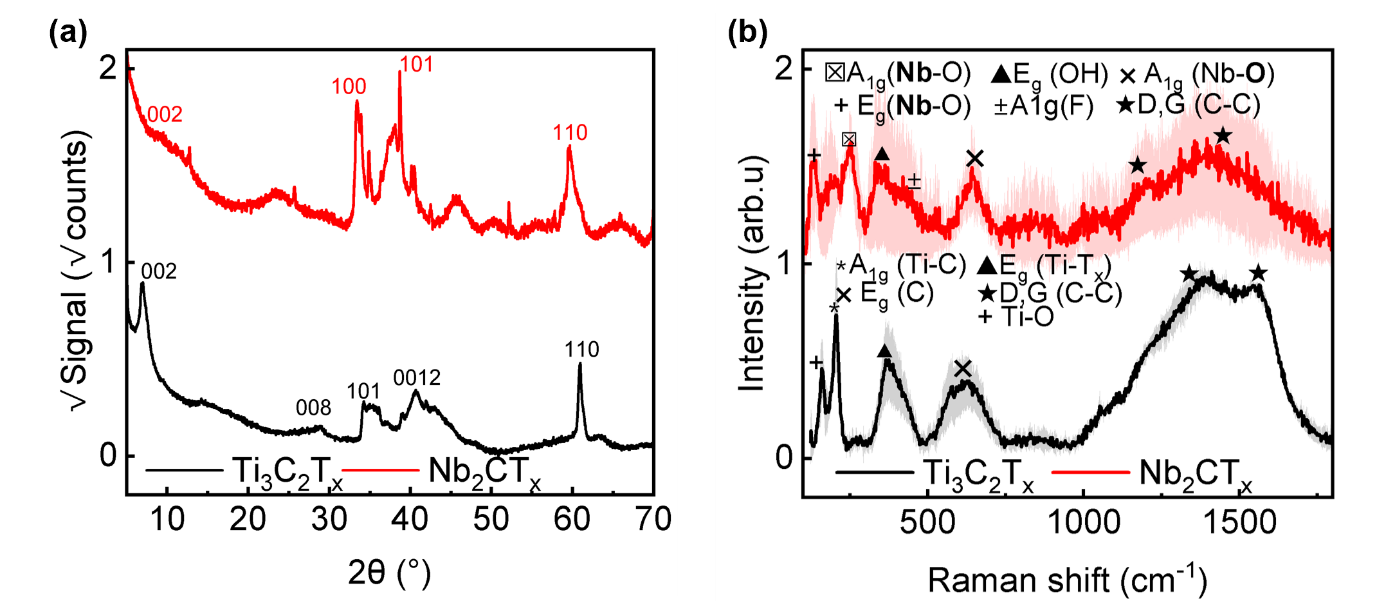


Figure S2: (a) XRD patterns of Ti3C2Tx and Nb2CTx, indicating their phase composition and preferred orientations. (b) Normalized mean Raman spectra of MXene powder with standard deviation (n≥3): Ti3C2Tx (black) and Nb2CTx (red)


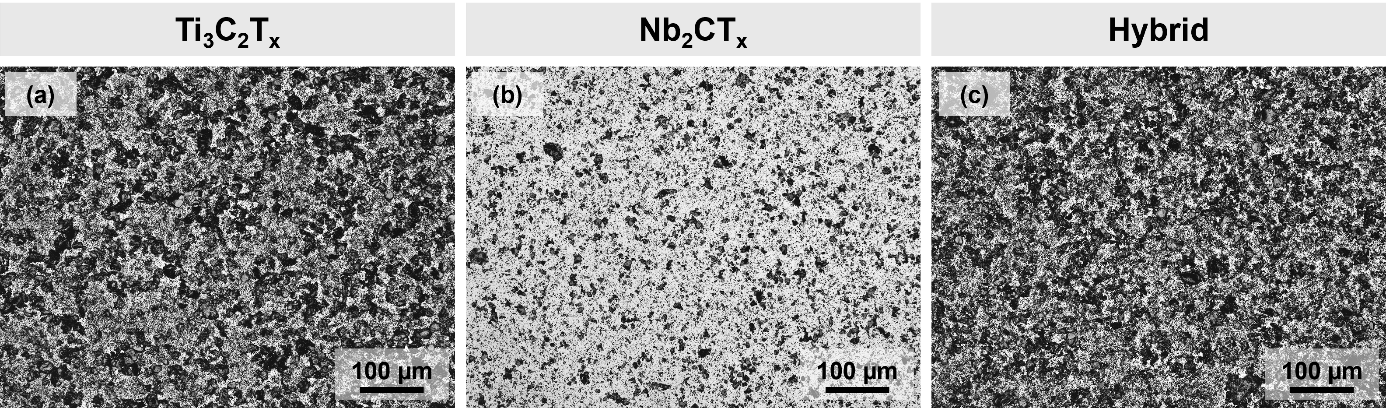


Figure S3: Light-microscope images of the air sprayed coatings for (a) Ti3C2Tx (b) Nb2CTx (c) Hybrid

Table S1: The surface roughness of the respective coatings was determined based on light microscopy images equivalent to those shown in Figure S3.

|  | **Sa** | **Sz** | **Sq** | **Ssk** | **Sku** |
| --- | --- | --- | --- | --- | --- |
| **Ti3C2Tx** | 1,197 | 1,638 | 26,204 | 2,147 | 10,186 |
| **Nb2CTx** | 0,168 | 0,273 | 6,776 | 3,354 | 26,039 |
| **Hybrid** | 0,868 | 1,253 | 24,409 | 2,493 | 13,930 |


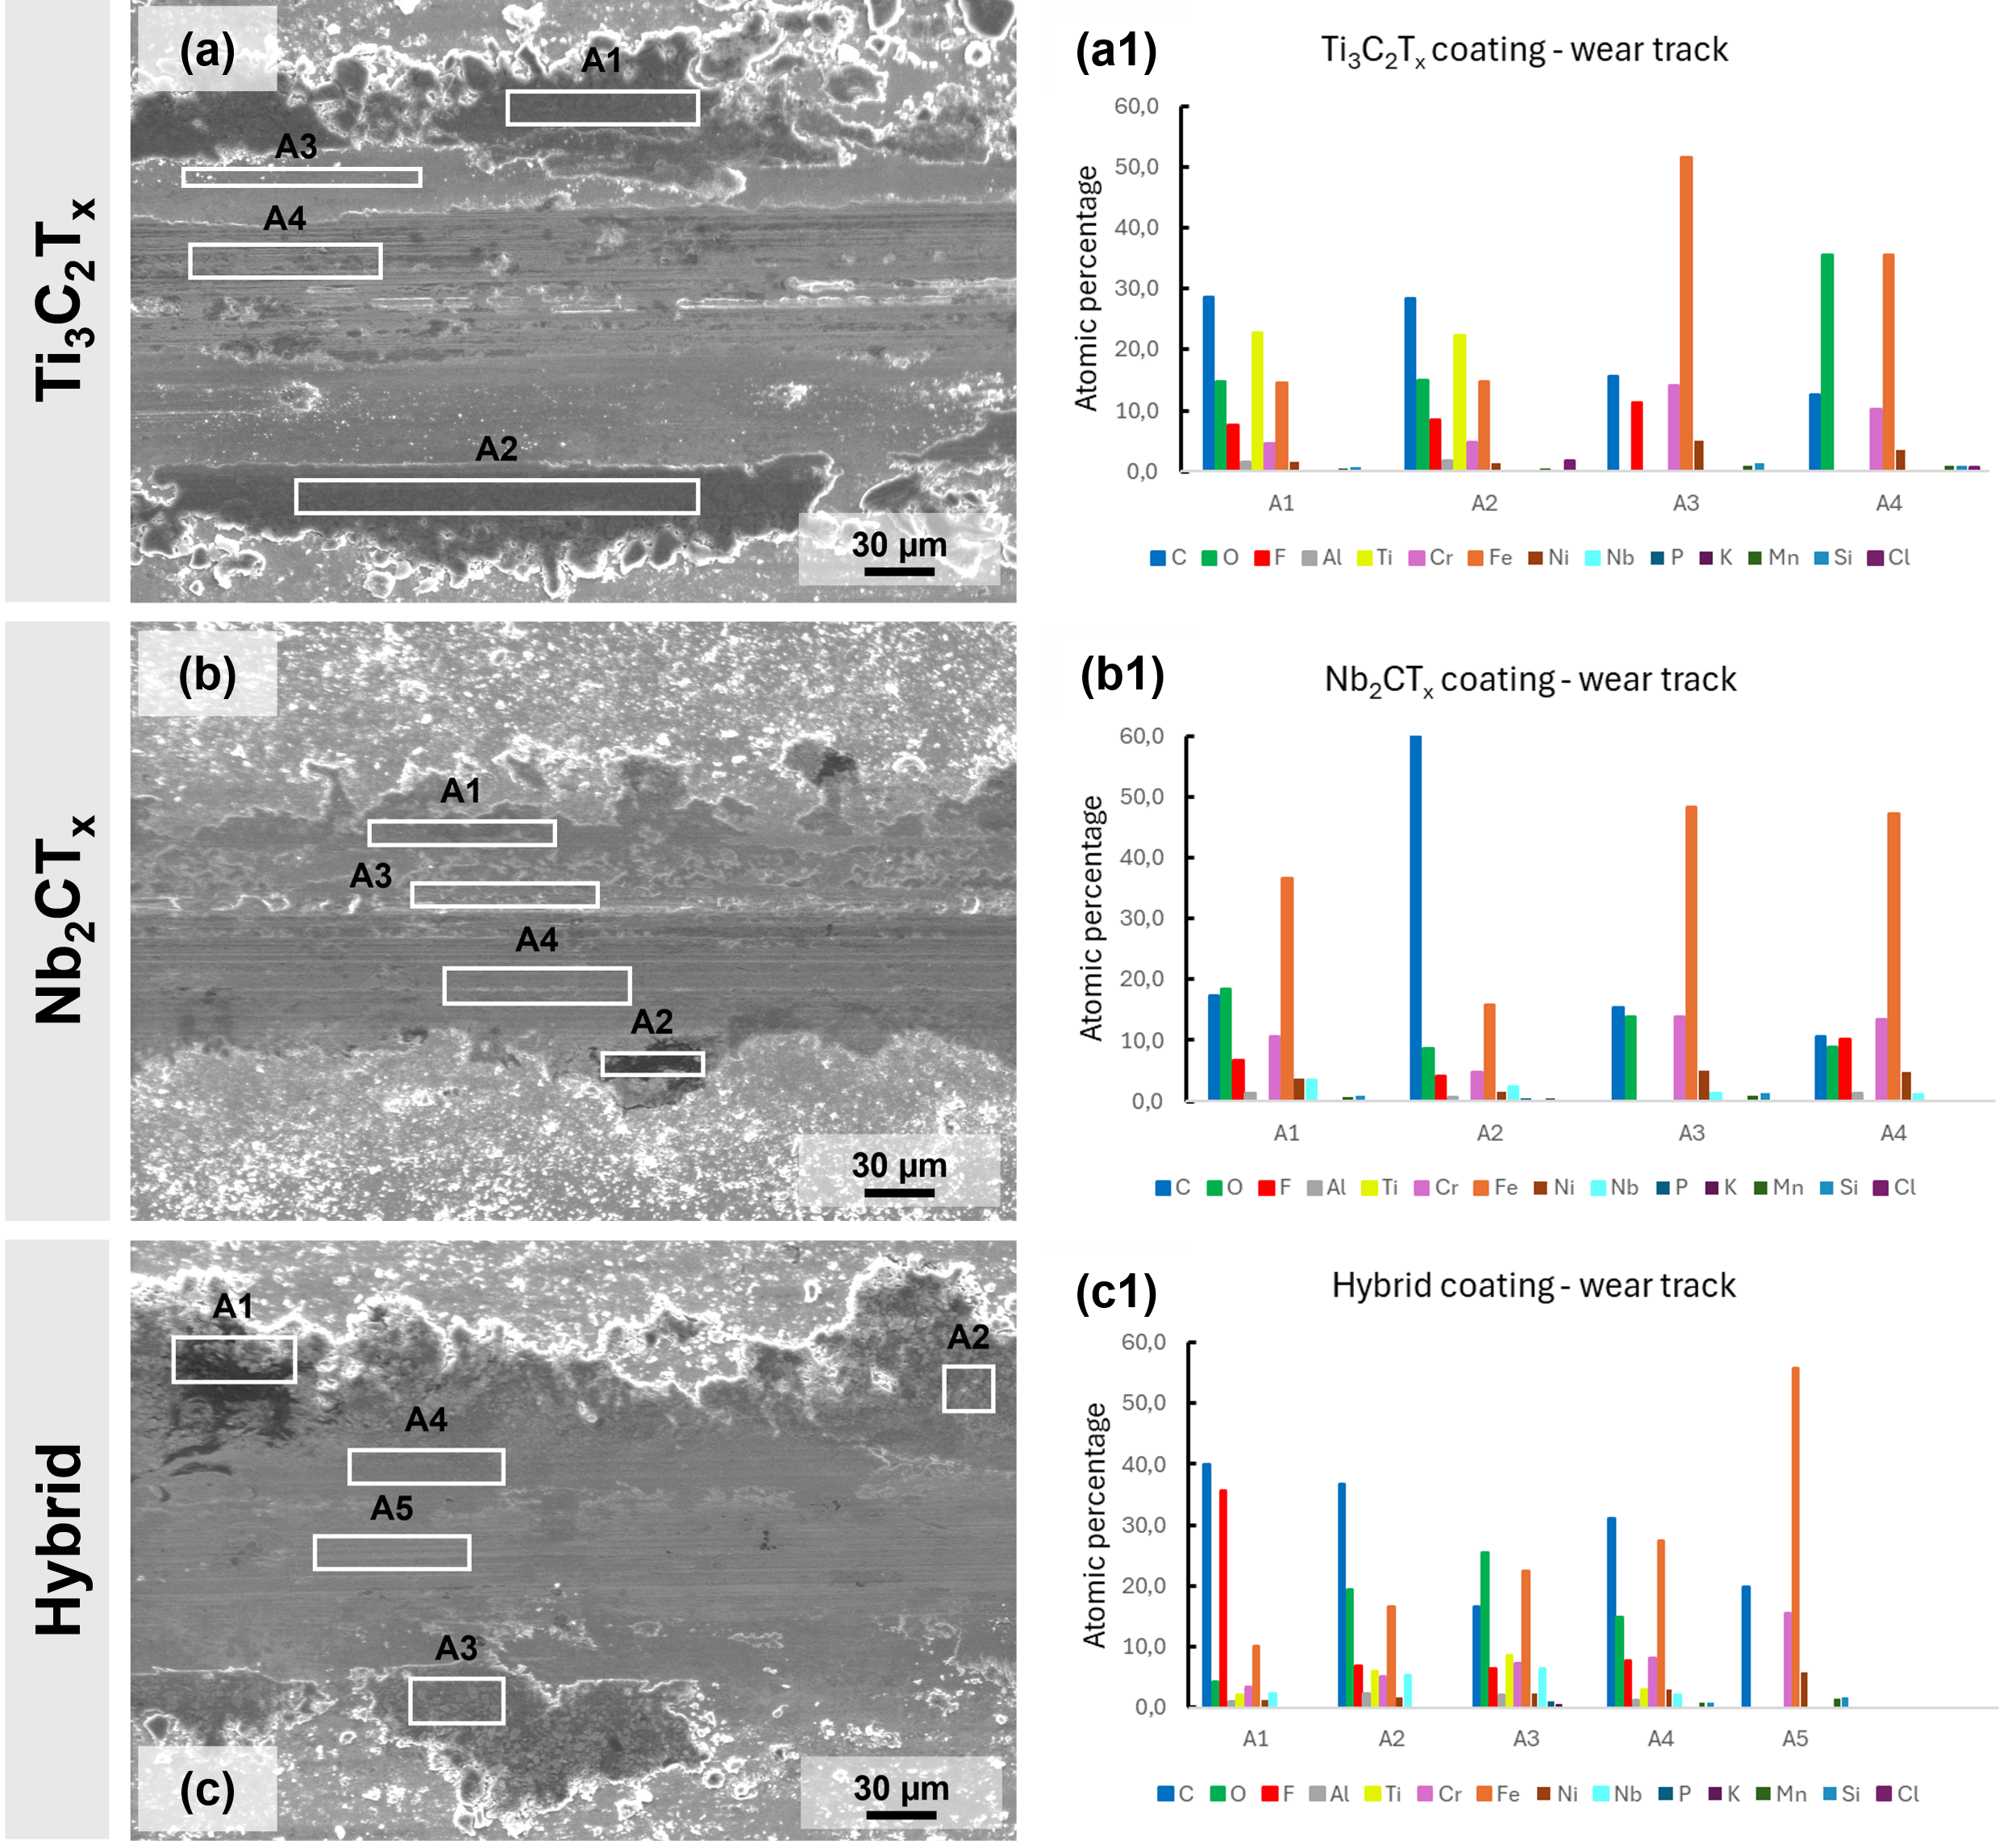


Figure S4: Energy-dispersive X-ray spectroscopy (EDS) analysis of the wear tracks for the different coatings. For the Ti₃C₂Tₓ coating (a), specific regions within the wear track were selected for analysis, with the corresponding elemental distribution maps shown in (a1). Similarly, the Nb₂CTₓ coating (b) was examined at marked areas within the wear track, and the resulting elemental maps are presented in (b1). For the hybrid coating (c), EDS measurements were also conducted at designated regions, with the respective element distribution results illustrated in (c1). These mappings provide insight into the elemental composition and spatial distribution of the coatings after tribological testing.


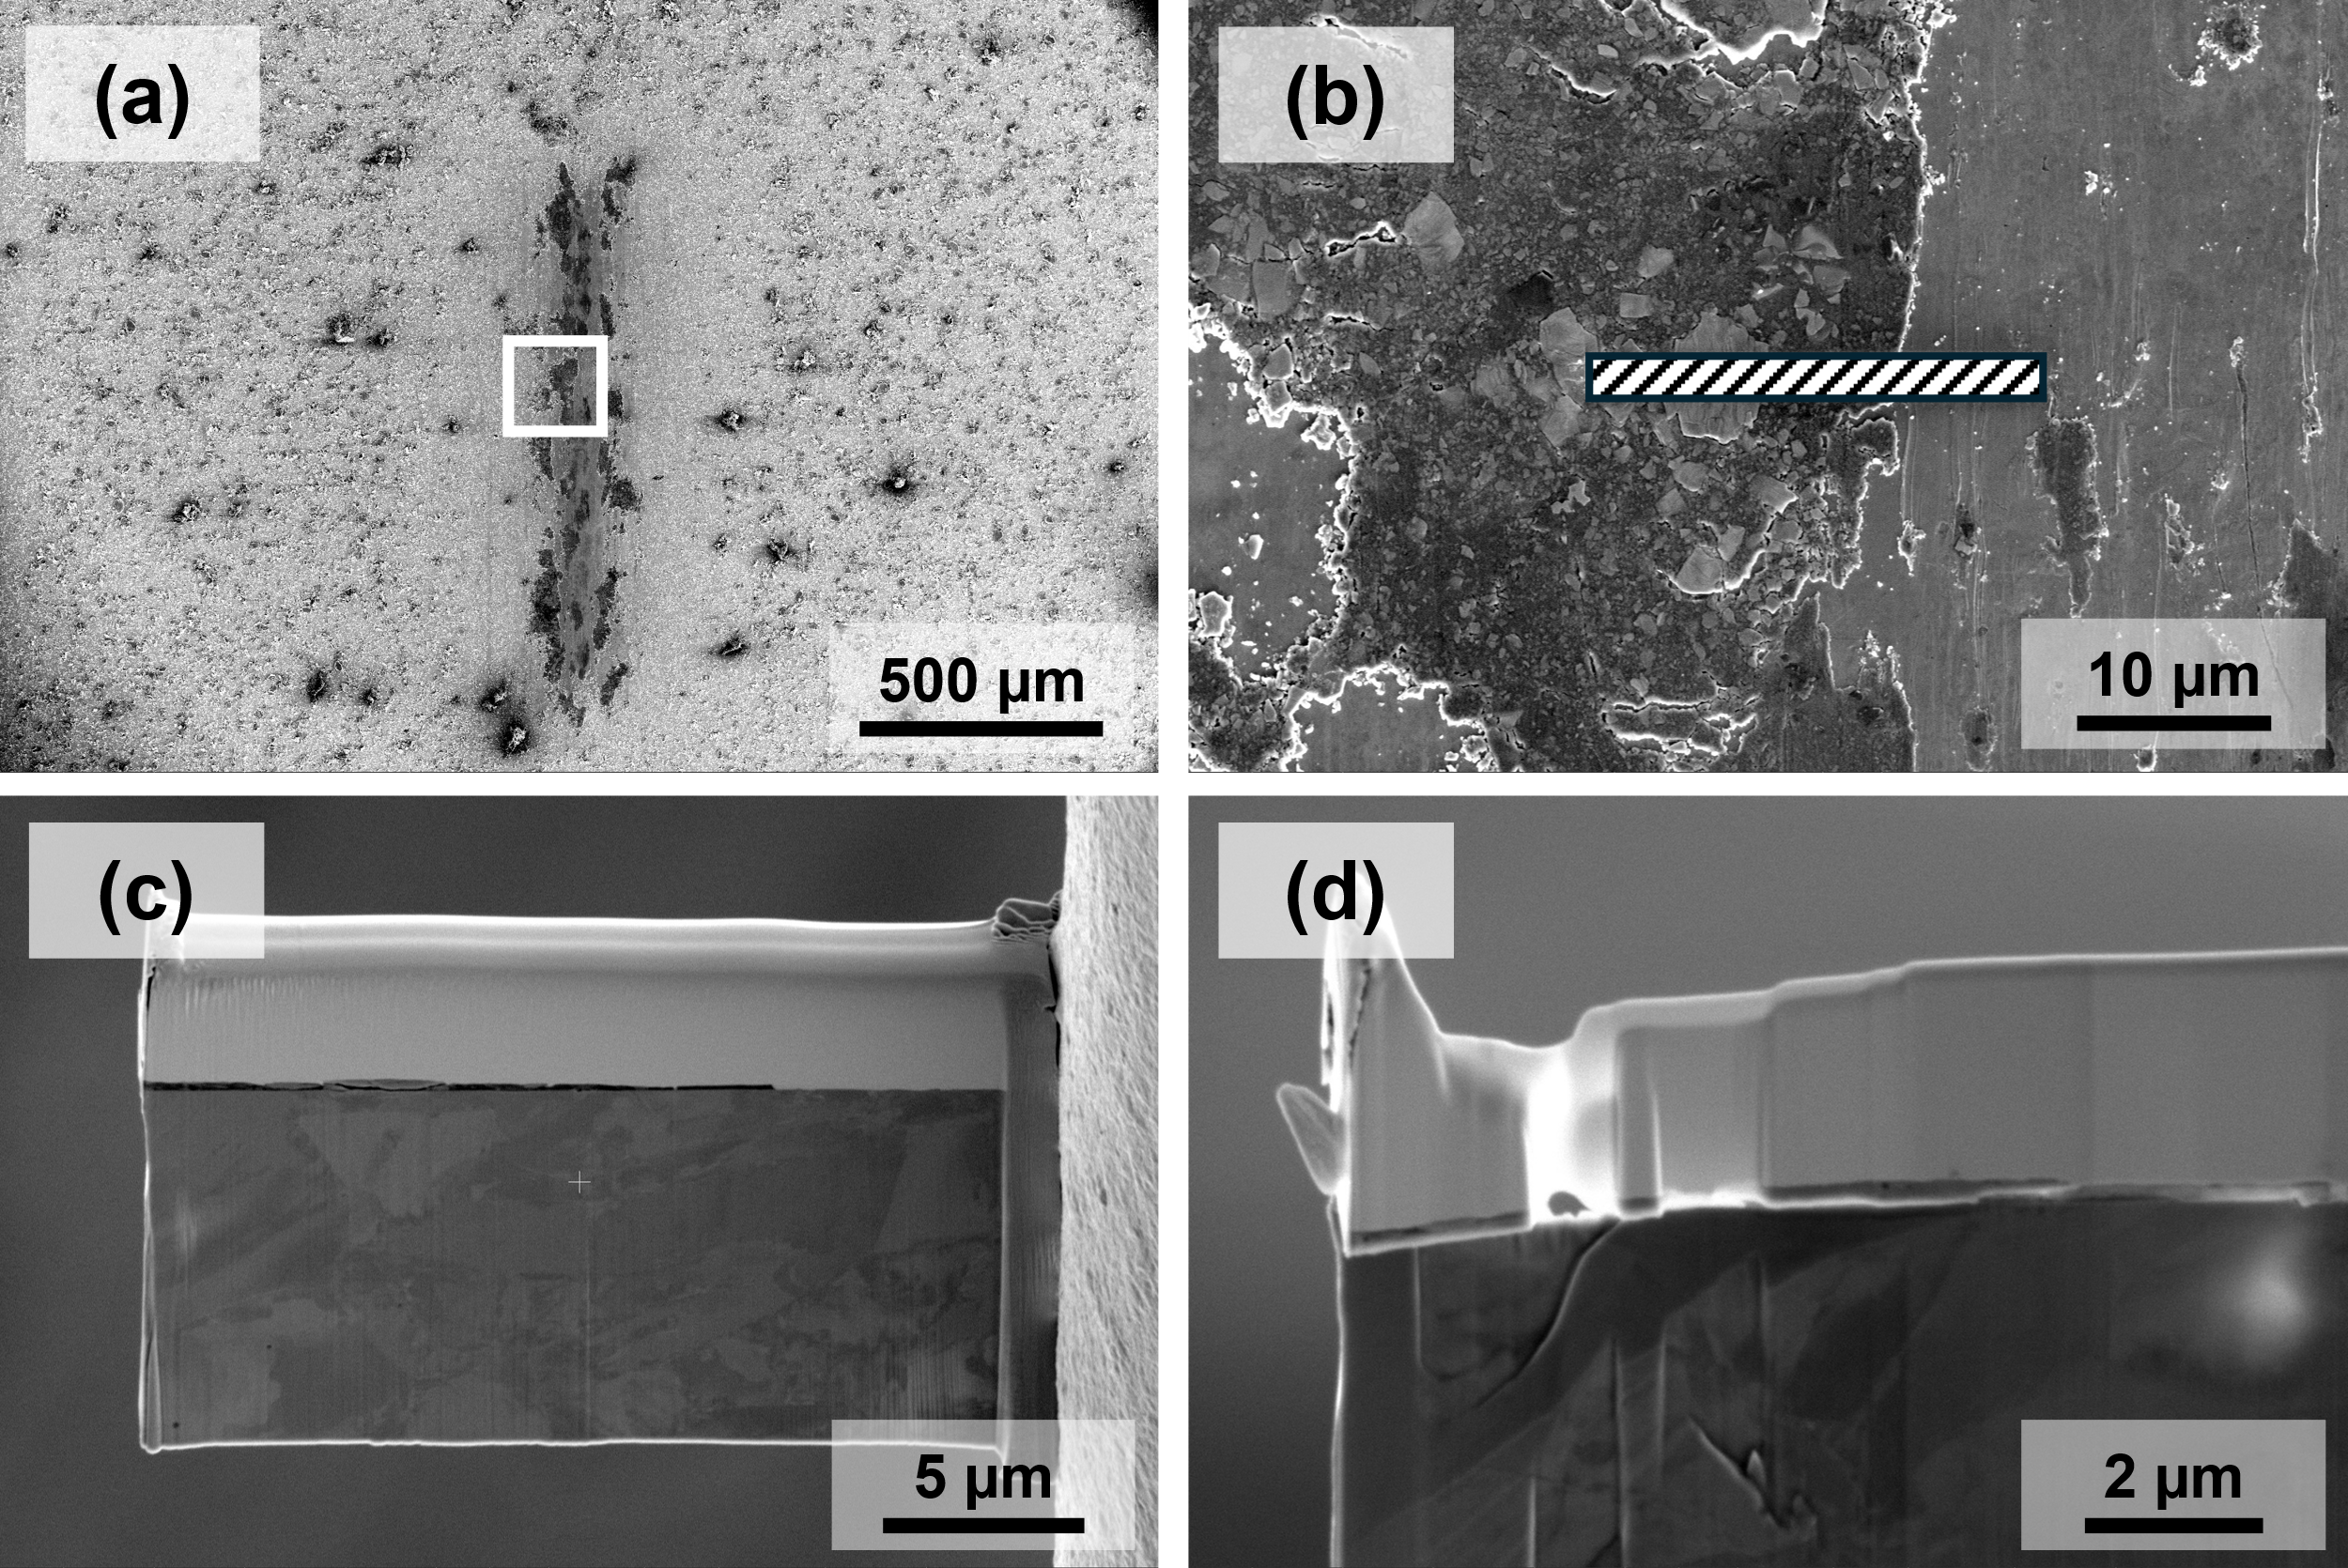


Figure S5: Overview of the TEM lamella preparation from the wear track of the hybrid coating. (a) SEM image of the wear track after a linear sliding friction test. (b) Zoomed-in section highlighting the region of interest showing the FIB cut position. (c) resulting cross-sectional TEM lamella. (d) presents the final TEM lamella, featuring two thinner regions specifically prepared for high-resolution TEM (HR-TEM) analysis.

Table S2: Summary of friction coefficients for different solid lubricants and hybrid coatings as reported in the literature

| **Coating** | **Contact pressure (GPa)** | **Counterbody** | **Speed (mm/s)** | **COF**  **(steady state)** |
| --- | --- | --- | --- | --- |
| **MXene Ti3C2Tx** | 0.35 [1], 0.46 [2],  0.3 - 0.5 [3], 0.3 [4],  0.5 - 0.8 [5], 0.48 [this study] | 6 mm Al2O3 [1],  5 mm Al2O3 [2],  4 mm AISI 52100 [3], 6 mm Si3N4 [4],  4 mm tungsten carbide [5], 6 mm Al2O3 [this study] | 1 [1], 2 [2], 2.5-6 [3], 1 [4],  2.5 [5],  1 [this study] | 0.21 [1], 0.16 [2],  0.2 - 0.3 [3], 0.13 - 0.2 [4], 0.11 - 0.5 [5],  0.17* [this study] |
| **MXene Nb2CTx** | 0.48 [this study] | 6 mm Al2O3 [this study | 1 [this study] | 0.17*[this study] |
| **Hybrid: Ti3C2Tx + Nb2CTx** | 0.48 [this study] | 6 mm Al2O3 [this study] | 1 [this study] | 0.14 - 0.17 [this study] |
| **Hybrid: Ti3C2Tx + MoS2** | 0.5 - 0.8 [5], 0.8 [6] | 4 mm tungsten carbide [5], 10 mm AISI 52100 [6], | 2.5 [5],  5 [6] | 0.11-0.32[5], 0.15 [6] |
| **Hybrid: Ti3C2Tx + Graphene** | 0.006 [7] | 9.526 mm diameter stainless steel ball coated with diamond-like  carbon (DLC) [7] | 100 [7] | 0.0042 [7] (N2 atmosphere) |
| **MoS2** | 0.5 - 0.8 [5], 0.45 [8], | 4 mm tungsten carbide [5], 3.2 mm 440C [8], | 2.5 [5],  1 [8] | 0.32 [5],  0.1 [8], |
| * until coating removal | | | | |


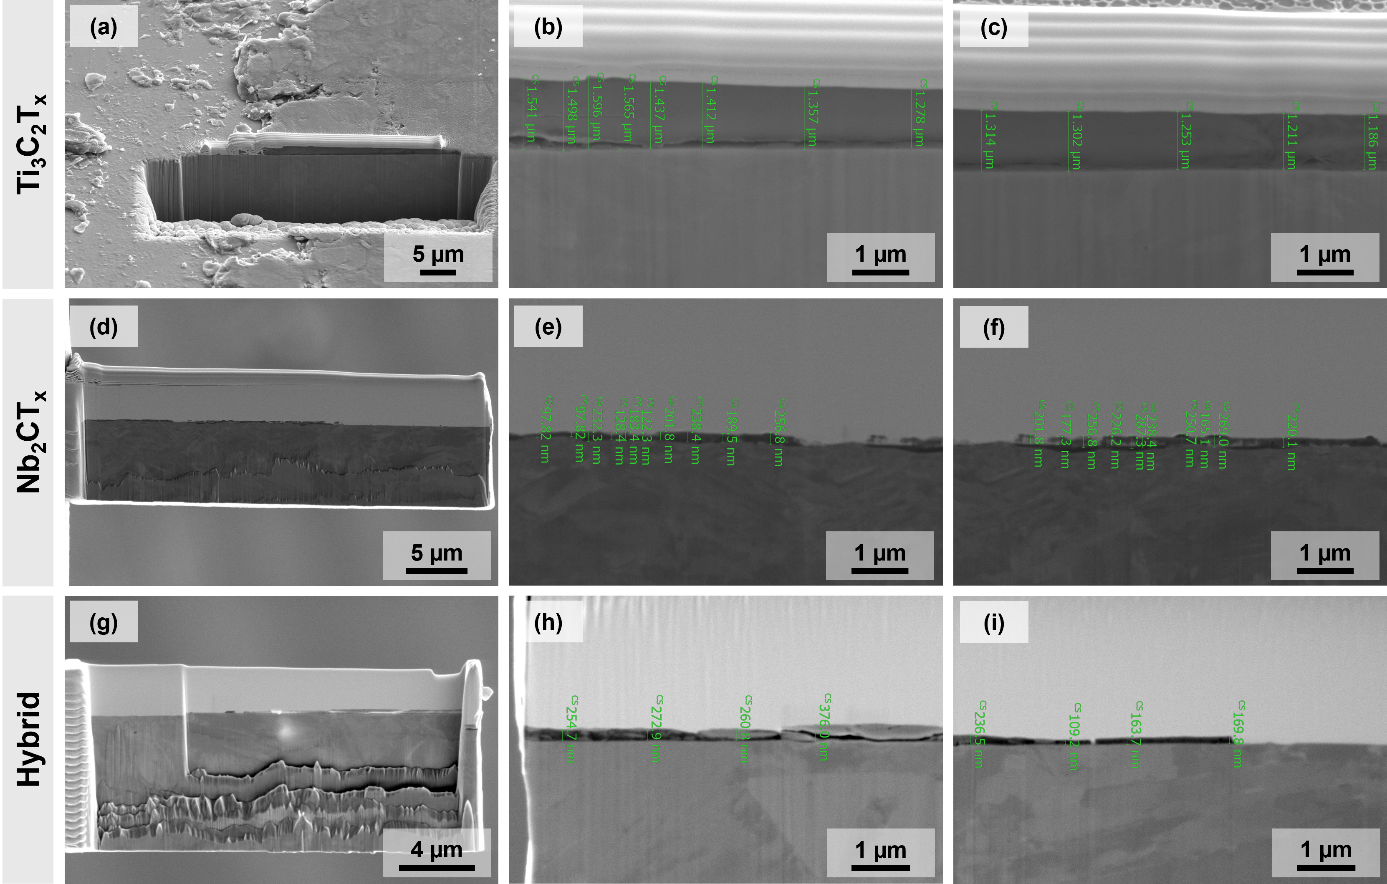


Figure S6: Cross-section and TEM lamellas with measured tribofilm thicknesses of the different coatings: (a) Cross-section of the tribofilm on the Ti3C2Tx coating (b) – (c) corresponding thickness measurement showing an average of 1383.2 ± 142 nm. (d) TEM lamella from the tribofilm of the Nb2CTx coating (e) – (f) measured tribofilm thickness 202.1 ± 56 nm. (g) TEM lamella extracted from the tribofilm of the hybrid coating (h) – (i) measured tribofilm thickness 230.5 ± 82 nm.


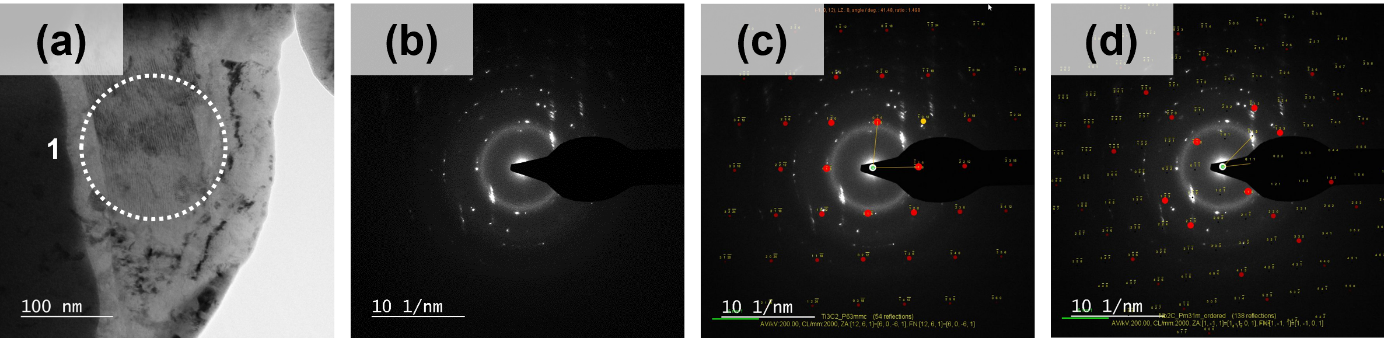


Figure S7: (a) TEM overview image of the lamella from the hybrid coating after the friction test, with a marked area (position 1) selected for detailed analysis. The corresponding selected area electron diffraction (SAED) pattern acquired at this position is shown in (b). (c-d) Further analysis of the diffraction pattern shows an overlap of the two phases: Ti3C2 in ZA [12,6,1] (c) and Nb2C in ZA [1,-1,1] (d).


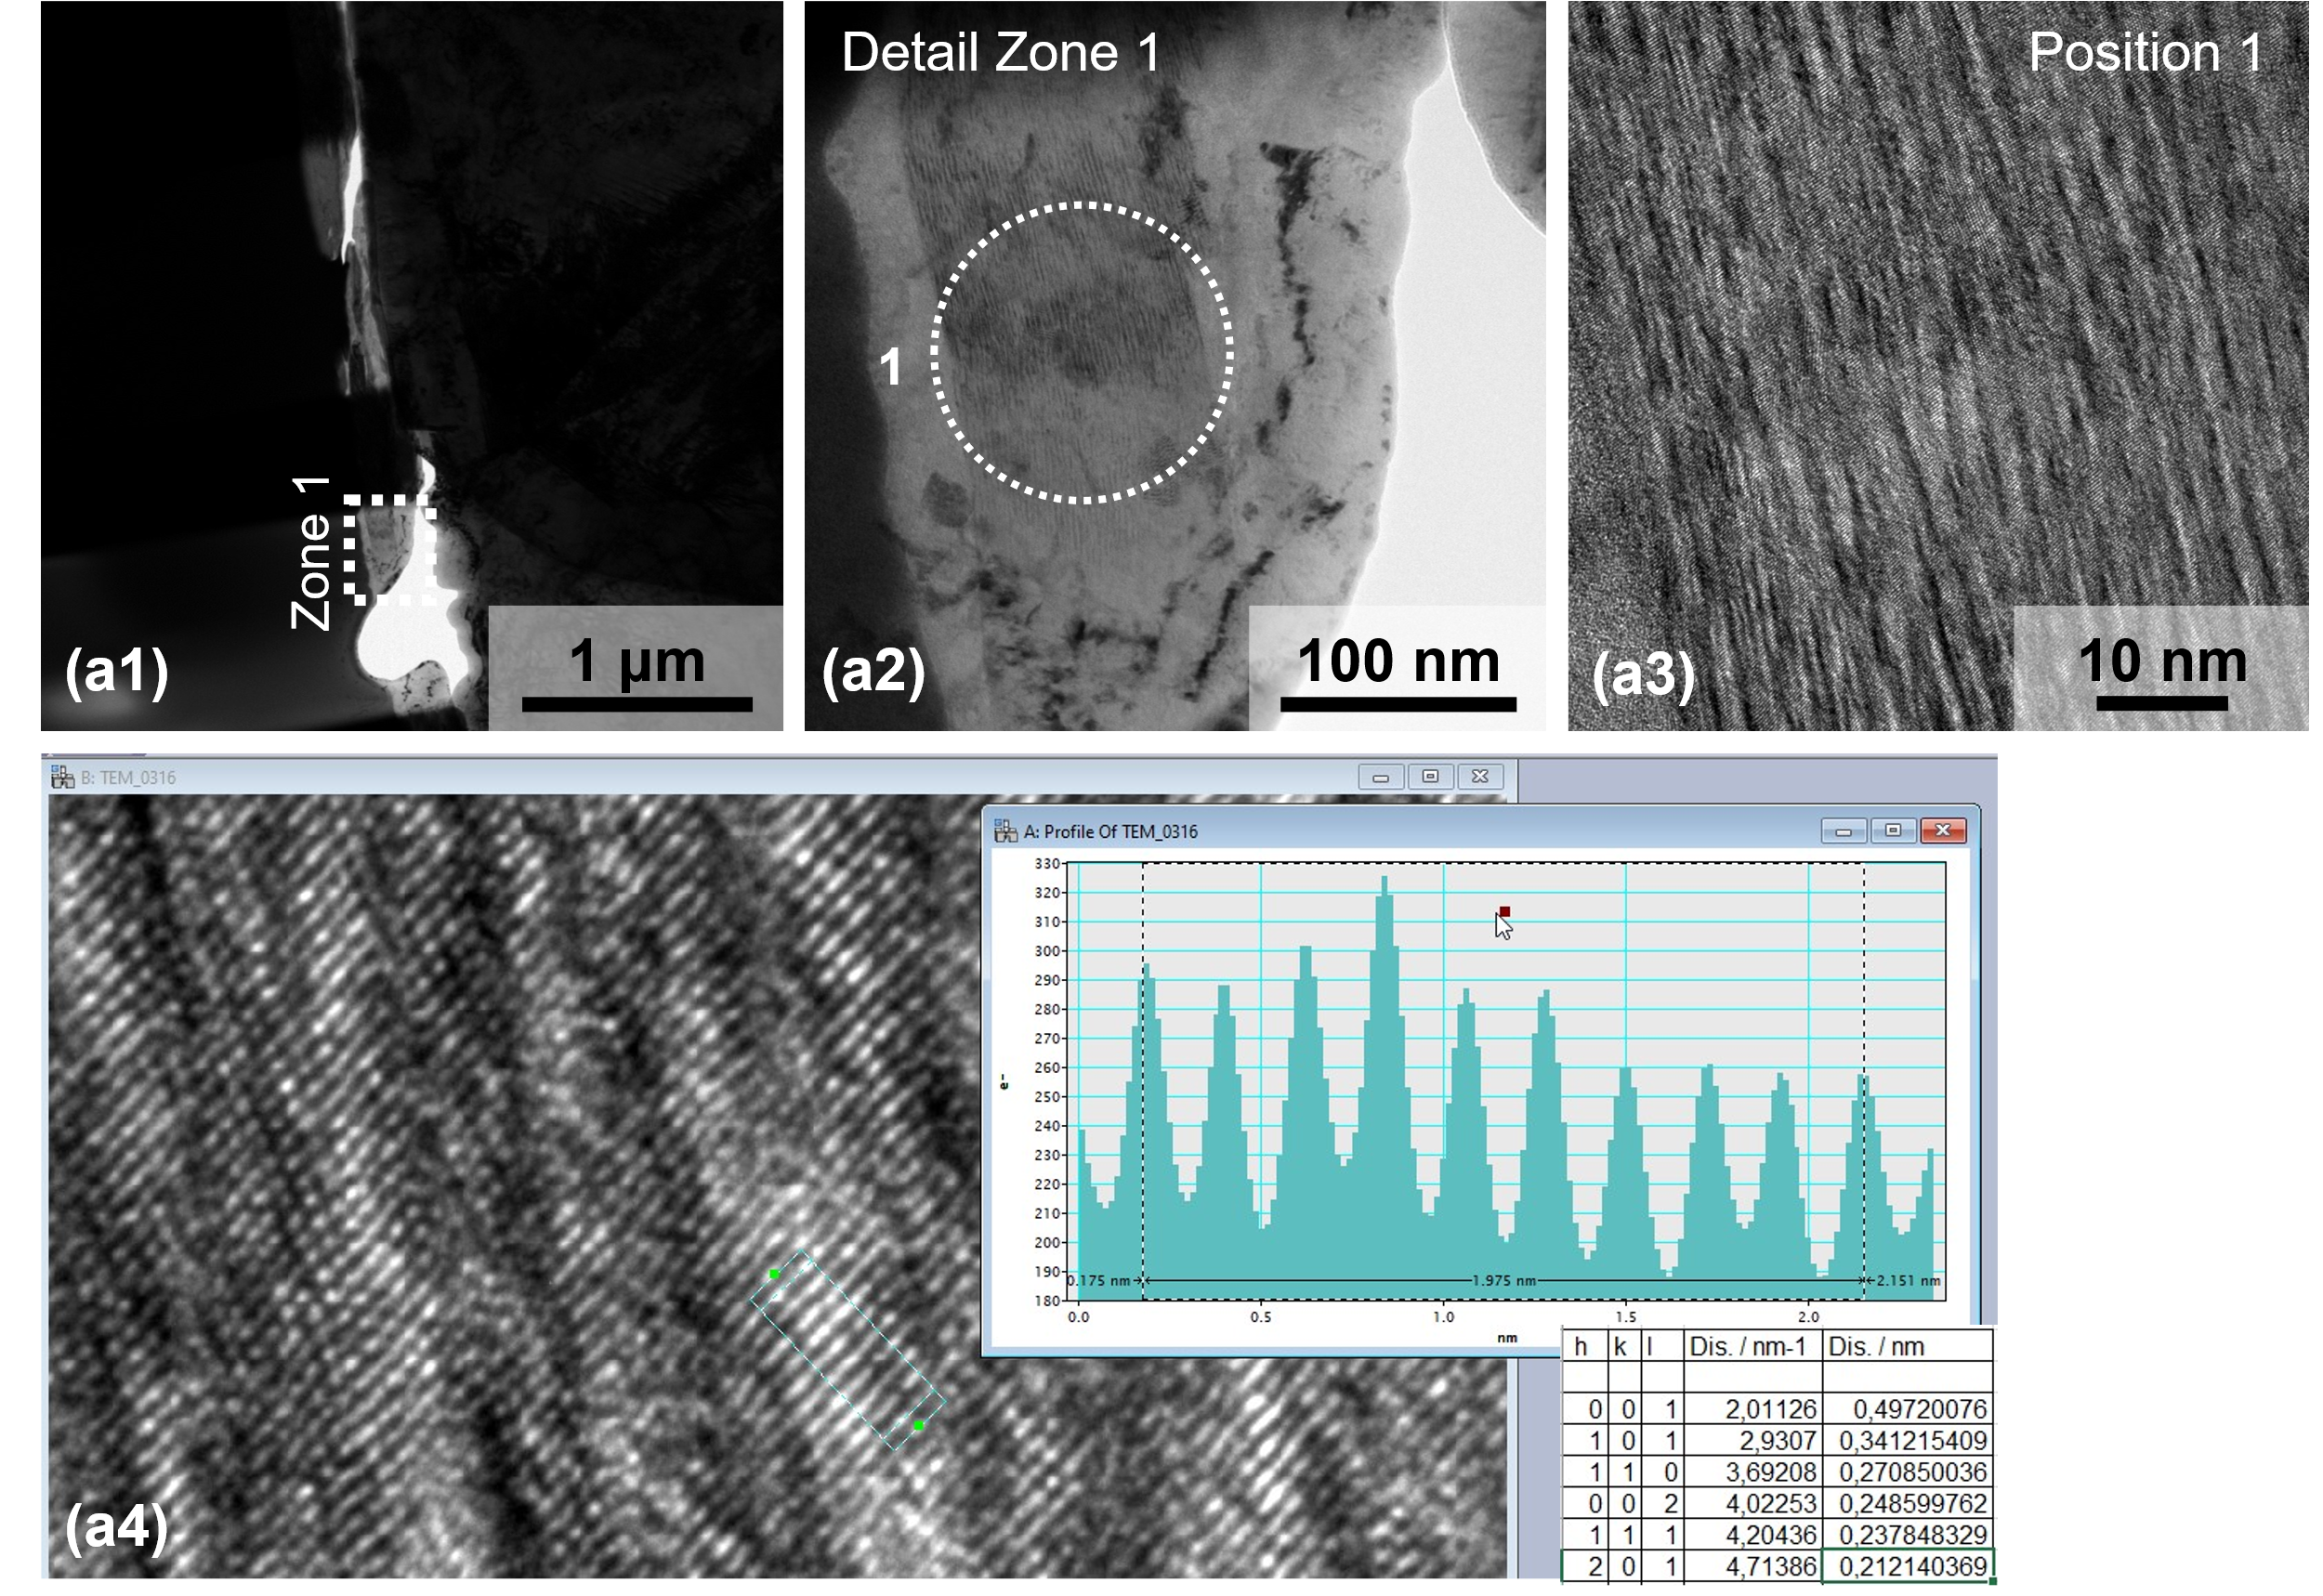


Figure S8: TEM characterization of the wear track of the hybrid coating: (a1) STEM overview image, (a2) bright field TEM image of the tribofilm in Zone 1. (3) HR-TEM image taken at position 1 while a4 shows the measurement of the lattice spacing.


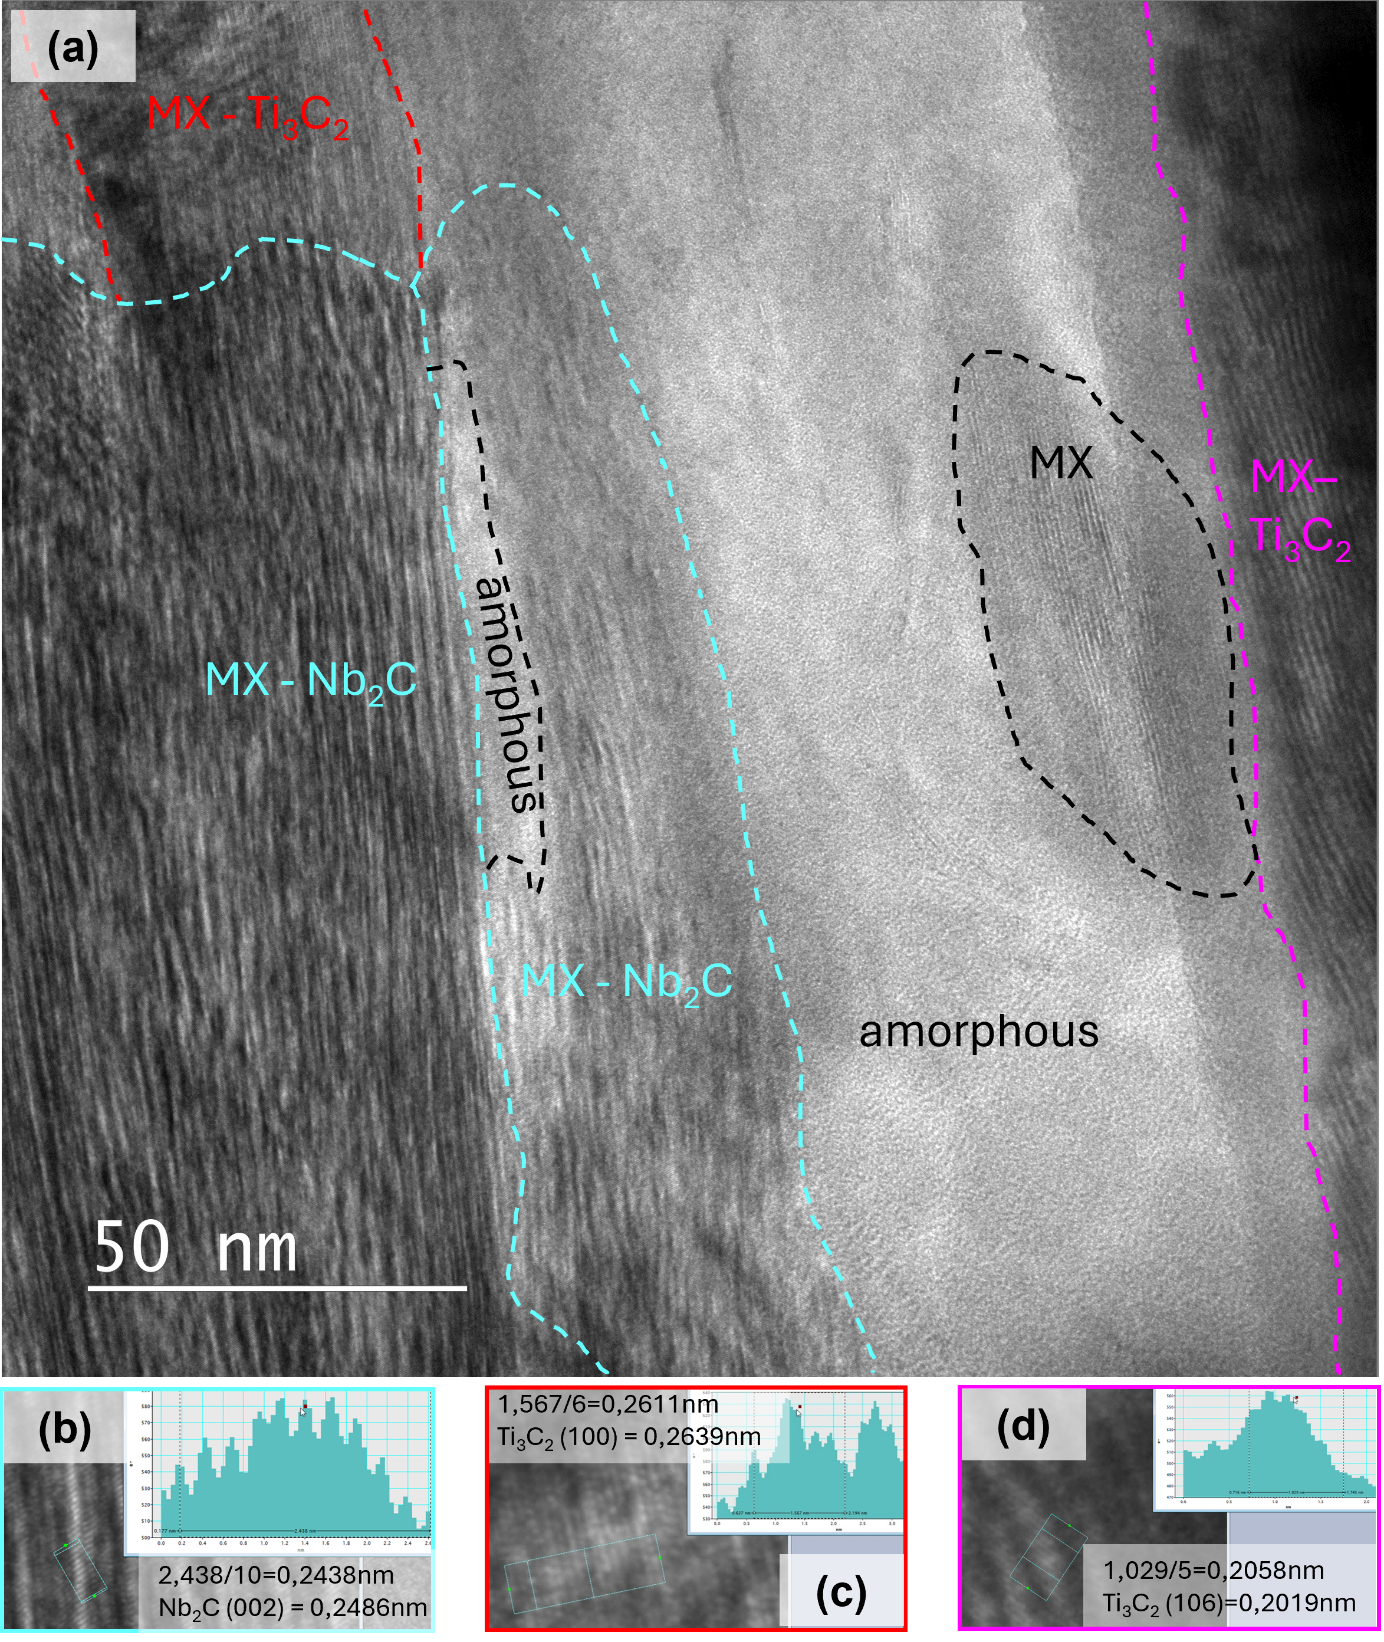


Figure S9: Transmission Electron Microscopy (TEM) analysis of the wear track on the hybrid coating. (a) HR-TEM analysis of the TEM lamella extracted. (b) The lattice plane distance measurement shows a mean lattice space of 0.2438nm, which is in good agreement of the Nb2C (002) reflex. Same for (c), measured 0,2611nm for Ti3C2 (100) reflex, and (d) 0,2058 for Ti3C2 (106) reflex.


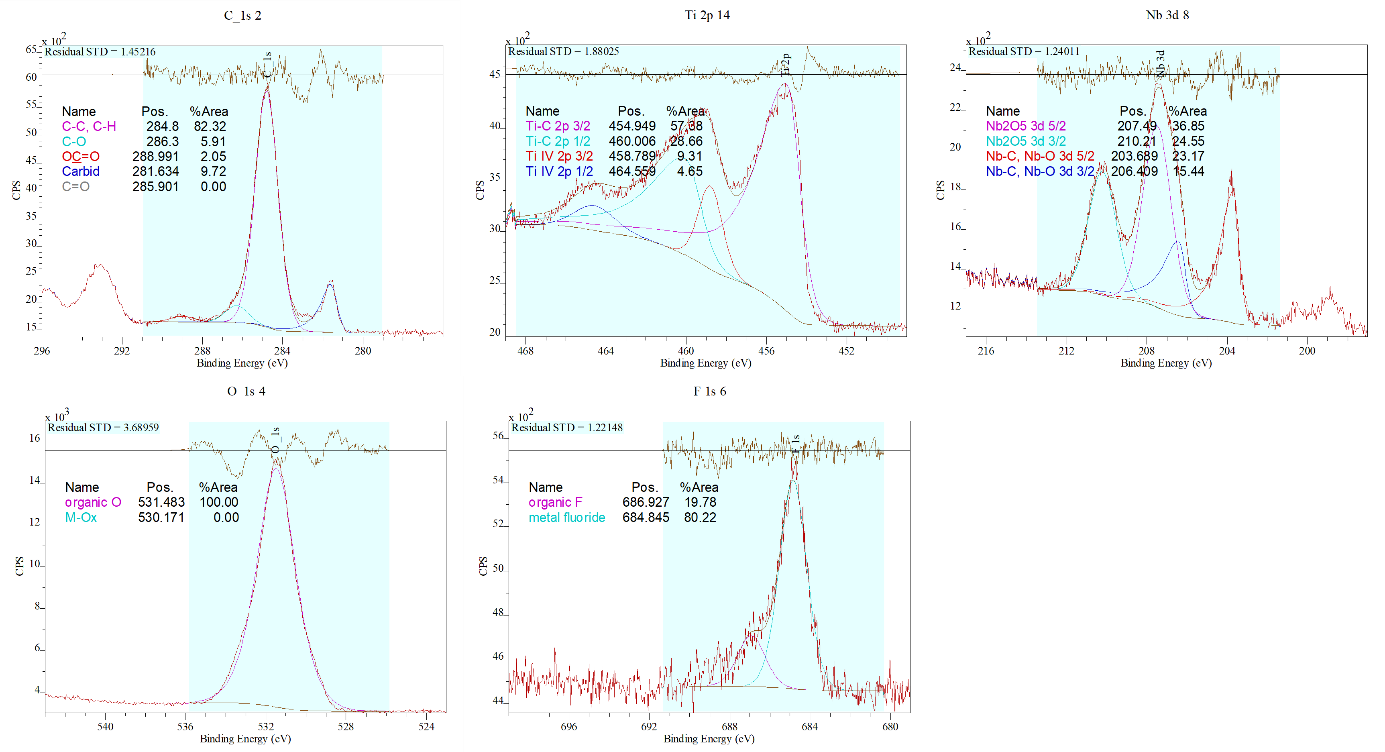


**(a)**


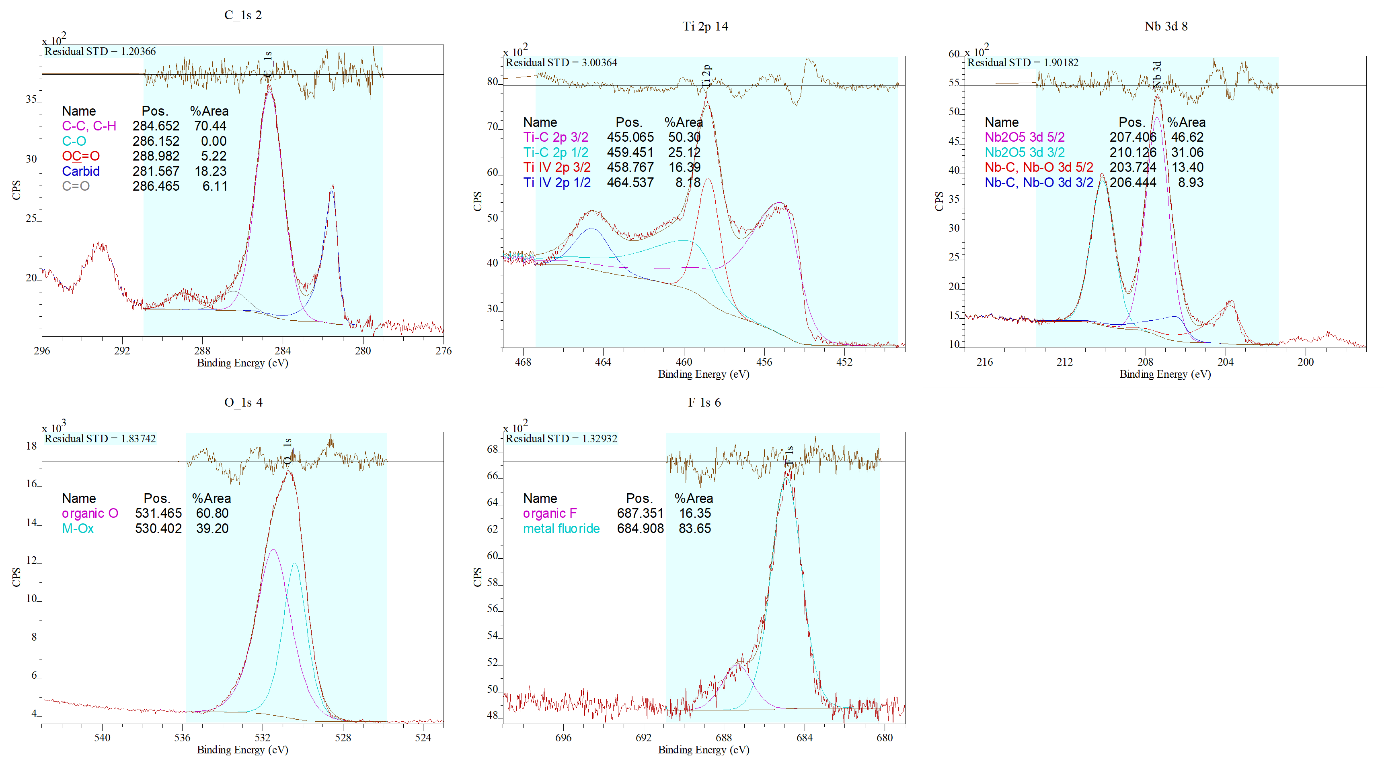


**(b)**

Figure S10: XPS survey of a) the reference (no tribological test) hybrid coating, and b) the wear track.

Table S3: Quantification of XPS survey over two scanned areas and oxide/carbide ratio.

[1] A. Rosenkranz *u. a.*, „Multi-layer Ti3C2Tx-nanoparticles (MXenes) as solid lubricants – Role of surface terminations and intercalated water“, *Appl. Surf. Sci.*, Bd. 494, S. 13–21, Nov. 2019, doi: 10.1016/j.apsusc.2019.07.171.

[2] M. Chhattal *u. a.*, „Solid lubrication performance of Ti2CTx coatings with reduced friction and extended durability“, *Tribol. Int.*, Bd. 194, S. 109535, Juni 2024, doi: 10.1016/j.triboint.2024.109535.

[3] A. Rosenkranz *u. a.*, „Solid-lubrication performance of Ti3C2Tx - Effect of tribo-chemistry and exfoliation“, *Mater. Today Nano*, Bd. 25, S. 100464, März 2024, doi: 10.1016/j.mtnano.2024.100464.

[4] P. G. Grützmacher *u. a.*, „Superior Wear-Resistance of Ti3C2Tx Multilayer Coatings“, *ACS Nano*, Bd. 15, Nr. 5, S. 8216–8224, Mai 2021, doi: 10.1021/acsnano.1c01555.

[5] D. F. Zambrano-Mera *u. a.*, „Solid lubrication performance of sandwich Ti3C2Tx-MoS2 composite coatings“, *Appl. Surf. Sci.*, Bd. 640, S. 158295, Dez. 2023, doi: 10.1016/j.apsusc.2023.158295.

[6] G. Boidi *u. a.*, „Solid lubrication performance of hybrid Ti3C2Tx/MoS2 coatings“, *Carbon*, Bd. 225, S. 119067, Mai 2024, doi: 10.1016/j.carbon.2024.119067.

[7] S. Huang, K. C. Mutyala, A. V. Sumant, und V. N. Mochalin, „Achieving superlubricity with 2D transition metal carbides (MXenes) and MXene/graphene coatings“, *Mater. Today Adv.*, Bd. 9, S. 100133, März 2021, doi: 10.1016/j.mtadv.2021.100133.

[8] J. F. Curry *u. a.*, „Highly Oriented MoS2 Coatings: Tribology and Environmental Stability“, *Tribol. Lett.*, Bd. 64, Nr. 1, S. 11, Sep. 2016, doi: 10.1007/s11249-016-0745-0.
